# Supplementary material for: Comparison of cubosomes and liposomes for the encapsulation and delivery of curcumin
Source: Royal Society of Chemistry journal article supplement (doi:10.1039/d0sm01655a), 2021-01-01
Supplement: d0sm01655a1.pdf [file d0sm01655a1.pdf]

## Supporting Information

### Comparison of cubosomes and liposomes for the encapsulation and delivery of curcumin

Cuihua Chang<sup>a, b, c</sup>; Thomas G. Meikle<sup>b</sup>; Calum J. Drummond<sup>b</sup>; Yanjun Yang<sup>a, c \*</sup>; Charlotte E. Conn<sup>b, \*</sup>

<sup>a</sup> State Key Laboratory of Food Science and Technology, Jiangnan University, Wuxi, Jiangsu, 214122, PR China

<sup>b</sup> School of Science, College of Science, Engineering and Health, RMIT University, 124 La Trobe Street, Melbourne, VIC 3000, Australia

<sup>c</sup> School of Food Science and Technology, Jiangnan University, Wuxi, Jiangsu, 214122, PR China

\*Corresponding author: [charlotte.conn@rmit.edu.au](mailto:charlotte.conn@rmit.edu.au), [yangyj@jiangnan.edu.cn](mailto:yangyj@jiangnan.edu.cn);

Tel.: +86 0510 85329080

Fax: +86 0510 85329080

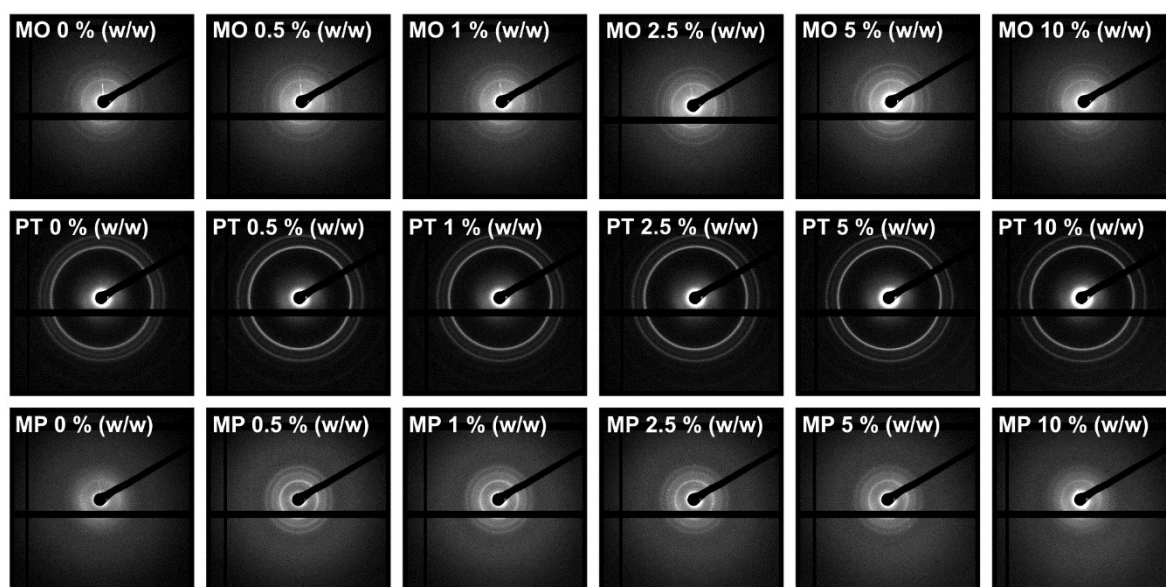

**Figure S1:** 2D Small angle diffraction patterns of MO, PT, and MP cubosomes vs curcumin concentration

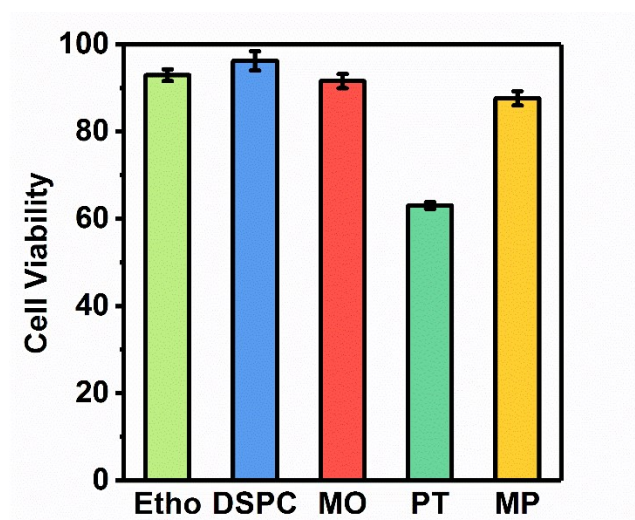

**Figure S2:** Cell viability of B16F10 following incubation with blank nanoparticle formulations (no loaded curcumin), as well as blank ethanol, at concentration of 40  $\mu\text{L/mL}$ . The data is presented as an average % of untreated cells for three separate experiments  $\pm$  SD.

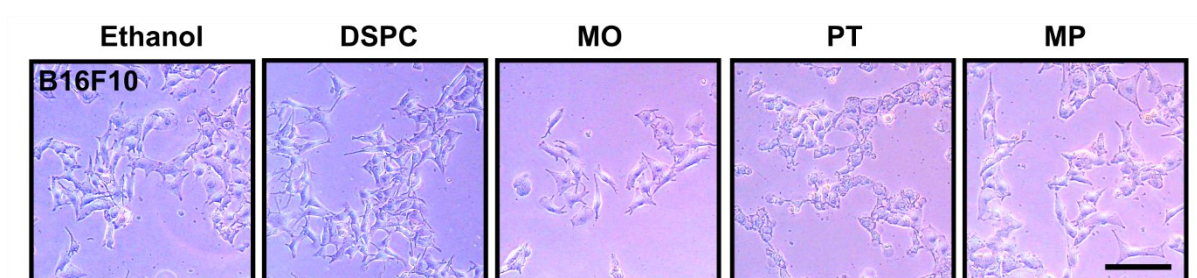

**Figure S3:** Micrographs of B16F10 cells treated with blank nanoparticle formulations (40  $\mu\text{L/mL}$  of nanoparticle dispersion in cell culture without curcumin loaded), as well as blank ethanol. Scale bar represents 20  $\mu\text{m}$ .
